# Supplementary material for: The metazoan landscape of mitochondrial DNA gene order and content is shaped by selection and affects mitochondrial transcription
Source: PubMed Central journal article supplement (PMC9871016; doi:10.1038/s42003-023-04471-4), 2023-01-23
Supplement: 42003_2023_4471_MOESM3_ESM.pdf [file 42003_2023_4471_MOESM3_ESM.pdf]

## Description of Additional Supplementary Files

**File name:** Supplementary Data S1

**Description:** All newly analyzed species within the database used.

**File name:** Supplementary Data S2

**Description:** All next generation sequencing experiments analyzed.
